# Supplementary material for: Basidiomycota Fungi and ROS: Genomic Perspective on Key Enzymes Involved in Generation and Mitigation of Reactive Oxygen Species
Source: Front Fungal Biol. 2022 Mar 23;3:837605. doi: 10.3389/ffunb.2022.837605 (PMC10512322; doi:10.3389/ffunb.2022.837605)
Supplement: Supplementary Table 2 — Information on the fungal species taxonomy and lifestyle, and genomes used in the genome mining. [file Data_Sheet_3.xlsx]

## Sheet: Genome info
Fungal species and genome version	MycoCosm genome abbreviation	Subphylum	Class	Order	Lifestyle	MycoCosm protein fasta file used (without .aa and .fasta suffixes)		Genome reference*		Permission to use yet unpublished genomes
Armillaria mellea DSM 3731	Armme1_1	Agaricomycotina	Agaricomycetes	Agaricales	pathogenic	Armme1_1_GeneCatalog_proteins_20140802		Collins et al. (2013)
Agrocybe praecox OKM6292 v1.0	Agrpra2	Agaricomycotina	Agaricomycetes	Agaricales	litter-decomposing	Agrpra2_GeneCatalog_proteins_20180618		Jon Karl Magnuson		x
Cortinarius glaucopus AT 2004 276 v2.0	Corgl3	Agaricomycotina	Agaricomycetes	Agaricales	symbiotic (mycorrhizal)	Corgl3_GeneCatalog_proteins_20130626		Miyauchi et al. (2020)
Laccaria bicolor v2.0	Lacbi2	Agaricomycotina	Agaricomycetes	Agaricales	symbiotic (mycorrhizal)	Lacbi2_GeneCatalog_proteins_20110203		Martin et al. (2008)
Agaricus bisporus var. bisporus (H97) v2.0	Agabi_varbisH97_2	Agaricomycotina	Agaricomycetes	Agaricales	litter-decomposing	Abisporus_varbisporusH97.v2.FilteredModels3.proteins.		Morin et al. (2012)
Coprinopsis cinerea	Copci1	Agaricomycotina	Agaricomycetes	Agaricales	litter-decomposing	Coprinopsis_cinerea.proteins		Stajich et al. (2010)
Coprinopsis cinerea Amut Bmut	Copci_AmutBmut1	Agaricomycotina	Agaricomycetes	Agaricales	litter-decomposing	Copci_AmutBmut1_GeneCatalog_proteins_20130522		Muraguchi et al. (2015)
Amanita muscaria Koide v1.0	Amamu1	Agaricomycotina	Agaricomycetes	Agaricales	symbiotic (mycorrhizal)	Amamu1_GeneCatalog_proteins_20120806		Kohler et al. (2015)
Schizophyllum commune H4-8 v3.0	Schco3	Agaricomycotina	Agaricomycetes	Agaricales	soft rot/other type of decay	Schco3_GeneCatalog_proteins_20130812		Ohm et al. (2010)
Fistulina hepatica v1.0	Fishe1	Agaricomycotina	Agaricomycetes	Agaricales	brown rot wood decay	Fishe1_GeneCatalog_proteins_20130122		Floudas et al. (2015)
Pleurotus ostreatus PC15 v2.0	PleosPC15_2	Agaricomycotina	Agaricomycetes	Agaricales	white rot wood decay	PleosPC15_2_GeneModels_FilteredModels1_aa		Riley et al. (2014), Castanera et al. (2016), Alfaro et al. (2016)
Paxillus involutus ATCC 200175 v1.0	Paxin1	Agaricomycotina	Agaricomycetes	Boletales	symbiotic (mycorrhizal)	Paxin1_GeneCatalog_proteins_20110501		Kohler et al. (2015)
Boletus edulis BED1 v4.0	Boled5	Agaricomycotina	Agaricomycetes	Boletales	symbiotic (mycorrhizal)	Boled5_GeneCatalog_proteins_20170707		Miyauchi et al. (2020)
Serpula lacrymans S7.9 v2.0	SerlaS7_9_2	Agaricomycotina	Agaricomycetes	Boletales	brown rot wood decay	SerlaS7_9_2_GeneCatalog_proteins_20120319		Eastwood et al. (2011)
Coniophora puteana v1.0	Conpu1	Agaricomycotina	Agaricomycetes	Boletales	brown rot wood decay	Conpu1_GeneCatalog_proteins_20101116		Floudas et al. (2012)
Gloeophyllum trabeum v1.0	Glotr1_1	Agaricomycotina	Agaricomycetes	Gloeophyllales	brown rot wood decay	Glotr1_1_GeneCatalog_proteins_20100921		Floudas et al. (2012)
Jaapia argillacea v1.0	Jaaar1	Agaricomycotina	Agaricomycetes	Jaapiales	soft rot/other type of decay	Jaaar1_GeneCatalog_proteins_20110803		Riley et al. (2014)
Pycnoporus cinnabarinus CIRM-BRFM 137 v1.0	Pycci1	Agaricomycotina	Agaricomycetes	Polyporales	white rot wood decay	Pycci1_GeneCatalog_proteins_20140109		Levasseur et al. (2014)
Trametes versicolor v 1.0	Trave1	Agaricomycotina	Agaricomycetes	Polyporales	white rot wood decay	Trave1_GeneCatalog_proteins_20101111		Floudas et al. (2012)
Polyporus brumalis BRFM 1820 v1.0	Polbr1	Agaricomycotina	Agaricomycetes	Polyporales	white rot wood decay	Polbr1_GeneCatalog_proteins_20150501		Miyauchi et al. (2018)
Dichomitus squalens CBS463.89 v1.0	Dicsqu463_1	Agaricomycotina	Agaricomycetes	Polyporales	white rot wood decay	Dicsqu463_1_GeneCatalog_proteins_20151203		Casado López et al. (2019)
Ganoderma sp.10597	Gansp1	Agaricomycotina	Agaricomycetes	Polyporales	white rot wood decay	Gansp1_GeneCatalog_proteins_20110326		Binder et al. (2013)
Antrodia serialis Sig1Antser10 v1.0	Antser1	Agaricomycotina	Agaricomycetes	Polyporales	brown rot wood decay	Antser1_GeneCatalog_proteins_20170404		Hage et al. (2021)
Fomitopsis pinicola	Fompi3	Agaricomycotina	Agaricomycetes	Polyporales	brown rot wood decay	Fompi3_GeneCatalog_proteins_20120705		Floudas et al. (2012)
Postia placenta MAD-698-R-SB12 v1.0	PosplRSB12_1	Agaricomycotina	Agaricomycetes	Polyporales	brown rot wood decay	PosplRSB12_1_GeneCatalog_proteins_20111103		Gaskell et al. (2017)
Fibroporia radiculosa TFFH 294	Fibra1	Agaricomycotina	Agaricomycetes	Polyporales	brown rot wood decay	Fibra1_GeneCatalog_proteins_20131030		Tang et al. (2012)
Wolfiporia cocos MD-104 SS10 v1.0	Wolco1	Agaricomycotina	Agaricomycetes	Polyporales	brown rot wood decay	Wolco1_GeneCatalog_proteins_20100915		Floudas et al. (2012)
Ceriporiopsis (Gelatoporia) subvermispora B	Cersu1	Agaricomycotina	Agaricomycetes	Polyporales	white rot wood decay	Ceriporiopsis_subvermispora.proteins		Fernandez-Fueyo et al. (2012)
Obba rivulosa 3A-2 v1.0	Obbri1	Agaricomycotina	Agaricomycetes	Polyporales	white rot wood decay	Obbri1_GeneCatalog_proteins_20140615		Miettinen et al. (2016)
Ceriporia viridans OMC1683 v1.0	Cervir1	Agaricomycotina	Agaricomycetes	Polyporales	white rot wood decay	Cervir1_GeneCatalog_proteins_20180925		Otto Miettinen		x
Leptoporus mollis OMC1684 v1.0	Lepmol1	Agaricomycotina	Agaricomycetes	Polyporales	soft rot/other type of decay	Lepmol1_GeneCatalog_proteins_20181030		Otto Miettinen		x
Phanerochaete chrysosporium RP-78 v2.2	Phchr2	Agaricomycotina	Agaricomycetes	Polyporales	white rot wood decay	Phchr2_GeneCatalog_proteins_20131210		Ohm et al. (2014)
Phlebia radiata Fr. (isolate 79, FBCC0043)	Phlrad1	Agaricomycotina	Agaricomycetes	Polyporales	white rot wood decay	Phlrad1_GeneCatalog_proteins_20181020		Kuuskeri et al. (2016)
Phlebia brevispora HHB-7030 SS6 v1.0	Phlbr1	Agaricomycotina	Agaricomycetes	Polyporales	white rot wood decay	Phlbr1_GeneCatalog_proteins_20110325		Binder et al. (2013)
Abortiporus biennis CIRM-BRFM 1778 v1.0	Abobie1	Agaricomycotina	Agaricomycetes	Polyporales	white rot wood decay	Abobie1_GeneCatalog_proteins_20170621		Hage et al. (2021)
Russula brevipes BPL707 v1.0	Rusbre1	Agaricomycotina	Agaricomycetes	Russulales	symbiotic (mycorrhizal)	Rusbre1_GeneCatalog_proteins_20161010		Looney et al. (2021)
Peniophora sp. CONTA v1.0	Lopni1	Agaricomycotina	Agaricomycetes	Russulales	white rot wood decay	Lopni1_GeneCatalog_proteins_20150213		Varga et al. (2019)
Heterobasidion annosum v2.0	Hetan2	Agaricomycotina	Agaricomycetes	Russulales	white rot wood decay	Hannosum_v2.FilteredModels1.proteins		Olson et al. (2012)
Stereum hirsutum FP-91666 SS1 v1.0	Stehi1	Agaricomycotina	Agaricomycetes	Russulales	white rot wood decay	Stehi1_GeneCatalog_proteins_20101026		Floudas et al. (2012)
Fomitiporia mediterranea v1.0	Fomme1	Agaricomycotina	Agaricomycetes	Hymenochaetales	white rot wood decay	Fomme1_GeneCatalog_proteins_20101122		Floudas et al. (2012)
Trichaptum abietinum v1.0	Triab1_1	Agaricomycotina	Agaricomycetes	Hymenochaetales	white rot wood decay	Triab1_1_GeneCatalog_proteins_20130513		Laszlo Nagy		x
Schizopora paradoxa KUC8140 v1.0	Schpa1	Agaricomycotina	Agaricomycetes	Hymenochaetales	white rot wood decay	Schpa1_GeneCatalog_proteins_20131225		Min et al. (2015)
Auricularia subglabra v2.0	Aurde3_1	Agaricomycotina	Agaricomycetes	Auriculariales	white rot wood decay	Aurde3_1_GeneCatalog_proteins_20130729		Floudas et al. (2012)
Botryobasidium botryosum v1.0	Botbo1	Agaricomycotina	Agaricomycetes	Cantharellales	soft rot/other type of decay	Botbo1_GeneCatalog_proteins_20110803		Riley et al. (2014)
Cantharellus anzutake C23 v1.0	Cananz1	Agaricomycotina	Agaricomycetes	Cantharellales	symbiotic (mycorrhizal)	Cananz1_GeneCatalog_proteins_20160317		Miyauchi et al. (2020)
Tulasnella calospora AL13/4D v1.0	Tulca1	Agaricomycotina	Agaricomycetes	Cantharellales	symbiotic (mycorrhizal)	Tulca1_GeneCatalog_proteins_20120608		Kohler et al. (2015)
Calocera cornea v1.0	Calco1	Agaricomycotina	Dacrymycetes	Dacrymycetales	soft rot/other type of decay	Calco1_GeneCatalog_proteins_20130417		Nagy et al. (2016)
Dacryopinax primogenitus DJM 731 SSP1 v1.0	Dacsp1	Agaricomycotina	Dacrymycetes	Dacrymycetales	soft rot/other type of decay	Dacsp1_GeneCatalog_proteins_20110131		Floudas et al. (2012)
Dacrymyces fennicus OMC1656 v1.0	Dactor1	Agaricomycotina	Dacrymycetes	Dacrymycetales	soft rot/other type of decay	Dactor1_GeneCatalog_proteins_20180816		Otto Miettinen		x
Cryptococcus neoformans var. neoformans JEC21	Cryne_JEC21_1	Agaricomycotina	Tremellomycetes	Tremellales	pathogenic	Cryne_JEC21_1_GeneCatalog_proteins_20120305		Loftus et al. (2005)
Cryptococcus neoformans var. grubii h99	Cryne_H99_1	Agaricomycotina	Tremellomycetes	Tremellales	pathogenic	Cryptococcus_neoformans_H99.proteins		Janbon et al. (2014)
Dioszegia cryoxerica v1.0	Diocr1	Agaricomycotina	Tremellomycetes	Tremellales	NA	Diocr1_GeneCatalog_proteins_20130123		Laurie Connell		x
Tremella mesenterica Fries v1.0	Treme1	Agaricomycotina	Tremellomycetes	Tremellales	mycoparasite	Treme1_best_proteins		Floudas et al. (2012)
Wallemia mellicola v1.0	Walse1	NA	Wallemiomycetes	Wallemiales	NA	Walse1_GeneCatalog_proteins_20100910		Padamsee et al. (2012)
Wallemia ichthyophaga EXF-994	Walic1	NA	Wallemiomycetes	Wallemiales	NA	Walic1_GeneCatalog_proteins_20131017		Zajc et al. (2013)
Ustilago maydis 521 v2.0	Ustma2_2	Ustilaginomycotina	Ustilaginomycetes	Ustilaginales	pathogenic	Ustma2_2_GeneCatalog_proteins_20171205		Kämper et al. (2006)
Exobasidium maculosum A7-4 v1.0	Exomac1	Ustilaginomycotina	Exobasidiomycetes	Exobasidiales	pathogenic	Exomac1_GeneCatalog_proteins_20171101		Marin Brewer		x
Malassezia globosa	Malgl1	Ustilaginomycotina	Malasseziomycetes	Malasseziales	pathogenic	Malassezia_globosa.proteins		Xu et al. (2007)
Rhodotorula glutinis v1.0	Rhoglu1	Pucciniomycotina	Microbotryomycetes	Sporidiobolales	NA	Rhoglu1_GeneCatalog_proteins_20160519		John Gladden		x
Melampsora larici-populina v2.0	Mellp2_3	Pucciniomycotina	Pucciniomycetes	Pucciniales	pathogenic	Mellp2_3_GeneCatalog_proteins_20151130		Persoons et al. (2021)
Puccinia graminis f. sp. tritici v2.0	Pucgr2	Pucciniomycotina	Pucciniomycetes	Pucciniales	pathogenic	Pucgr2_GeneCatalog_proteins_20150718		Duplessis et al. (2011), Cuomo et al. (2017)
Cronartium quercuum f. sp. fusiforme G11 v1.0	Croqu1	Pucciniomycotina	Pucciniomycetes	Pucciniales	pathogenic	Croqu1_GeneCatalog_proteins_20120612		Pendleton et al. (2014)
Septobasidium sp. PNB30-8B v1.0	Sepsp1	Pucciniomycotina	Pucciniomycetes	Septobasidiales	pathogenic	Sepsp1_GeneCatalog_proteins_20150424		Romina Gazis		x
* Complete genome references:
Alfaro et al. (2016)	Alfaro M, Castanera R, Lavín JL, Grigoriev IV, Oguiza JA, Ramírez L, Pisabarro AG (2016). Comparative and transcriptional analysis of the predicted secretome in the lignocellulose-degrading basidiomycete fungus Pleurotus ostreatus. Environ Microbiol. 18(12):4710-4726. doi: 10.1111/1462-2920.13360
Binder et al. (2013)	Binder M, Justo A, Riley R, Salamov A, Lopez-Giraldez F, Sjökvist E, Copeland A, Foster B, Sun H, Larsson E, Larsson KH, Townsend J, Grigoriev IV, Hibbett DS (2013). Phylogenetic and phylogenomic overview of the Polyporales. Mycologia 105(6):1350-73. doi: 10.3852/13-003
Casado López et al. (2019)	Casado López S, Peng M, Daly P, Andreopoulos B, Pangilinan J, Lipzen A, Riley R, Ahrendt S, Ng V, Barry K, Daum C, Grigoriev IV, Hildén KS, Mäkelä MR, de Vries RP (2019). Draft Genome Sequences of Three Monokaryotic Isolates of the White-Rot Basidiomycete Fungus Dichomitus squalens. Microbiol Resour Announc 8(18):. doi: 10.1128/MRA.00264-19
Castanera et al. (2016)	Castanera R, López-Varas L, Borgognone A, LaButti K, Lapidus A, Schmutz J, Grimwood J, Pérez G, Pisabarro AG, Grigoriev IV, Stajich JE, Ramírez L (2016). Transposable Elements versus the Fungal Genome: Impact on Whole-Genome Architecture and Transcriptional Profiles. PLoS Genet 12(6):e1006108. doi: 10.1371/journal.pgen.1006108
Collins et al. (2013)	Collins C, Keane TM, Turner DJ, O'Keeffe G, Fitzpatrick DA, Doyle S (2013). Genomic and proteomic dissection of the ubiquitous plant pathogen, Armillaria mellea: toward a new infection model system. J Proteome Res 12(6):2552-70. doi: 10.1021/pr301131t
Cuomo et al. (2017)	Cuomo CA, Bakkeren G, Khalil HB, Panwar V, Joly D, Linning R, Sakthikumar S, Song X, Adiconis X, Fan L, Goldberg JM, Levin JZ, Young S, Zeng Q, Anikster Y, Bruce M, Wang M, Yin C, McCallum B, Szabo LJ, Hulbert S, Chen X, Fellers JP (2017). Comparative Analysis Highlights Variable Genome Content of Wheat Rusts and Divergence of the Mating Loci. G3 (Bethesda) 7(2):361-376. doi: 10.1534/g3.116.032797
Duplessis et al. (2011)	Duplessis S, Cuomo CA, Lin YC, Aerts A, Tisserant E, Veneault-Fourrey C, Joly DL, Hacquard S, Amselem J, Cantarel BL, Chiu R, Coutinho PM, Feau N, Field M, Frey P, Gelhaye E, Goldberg J, Grabherr MG, Kodira CD, Kohler A, Kües U, Lindquist EA, Lucas SM, Mago R, Mauceli E, Morin E, Murat C, Pangilinan JL, Park R, Pearson M, Quesneville H, Rouhier N, Sakthikumar S, Salamov AA, Schmutz J, Selles B, S…
Eastwood et al. (2011)	Eastwood DC, Floudas D, Binder M, Majcherczyk A, Schneider P, Aerts A, Asiegbu FO, Baker SE, Barry K, Bendiksby M, Blumentritt M, Coutinho PM, Cullen D, de Vries RP, Gathman A, Goodell B, Henrissat B, Ihrmark K, Kauserud H, Kohler A, LaButti K, Lapidus A, Lavin JL, Lee YH, Lindquist E, Lilly W, Lucas S, Morin E, Murat C, Oguiza JA, Park J, Pisabarro AG, Riley R, Rosling A, Salamov A, Schmidt O, S…
Fernandez-Fueyo et al. (2012)	Fernandez-Fueyo E, Ruiz-Dueñas FJ, Ferreira P, Floudas D, Hibbett DS, Canessa P, Larrondo LF, James TY, Seelenfreund D, Lobos S, Polanco R, Tello M, Honda Y, Watanabe T, Watanabe T, Ryu JS, Kubicek CP, Schmoll M, Gaskell J, Hammel KE, St John FJ, Vanden Wymelenberg A, Sabat G, Splinter BonDurant S, Syed K, Yadav JS, Doddapaneni H, Subramanian V, Lavín JL, Oguiza JA, Perez G, Pisabarro AG, Ramirez…
Floudas et al. (2012)	Floudas D, Binder M, Riley R, Barry K, Blanchette RA, Henrissat B, Martínez AT, Otillar R, Spatafora JW, Yadav JS, Aerts A, Benoit I, Boyd A, Carlson A, Copeland A, Coutinho PM, de Vries RP, Ferreira P, Findley K, Foster B, Gaskell J, Glotzer D, Górecki P, Heitman J, Hesse C, Hori C, Igarashi K, Jurgens JA, Kallen N, Kersten P, Kohler A, Kües U, Kumar TK, Kuo A, LaButti K, Larrondo LF, Lindquist …
Floudas et al. (2015)	Floudas D, Held BW, Riley R, Nagy LG, Koehler G, Ransdell AS, Younus H, Chow J, Chiniquy J, Lipzen A, Tritt A, Sun H, Haridas S, LaButti K, Ohm RA, Kües U, Blanchette RA, Grigoriev IV, Minto RE, Hibbett DS (2015). Evolution of novel wood decay mechanisms in Agaricales revealed by the genome sequences of Fistulina hepatica and Cylindrobasidium torrendii. Fungal Genet Biol 76:78-92. doi: 10.1016/j.…
Gaskell et al. (2017)	Gaskell J, Kersten P, Larrondo LF, Canessa P, Martinez D, Hibbett D, Schmoll M, Kubicek CP, Martinez AT, Yadav J, Master E, Magnuson JK, Yaver D, Berka R, Lail K, Chen C, LaButti K, Nolan M, Lipzen A, Aerts A, Riley R, Barry K, Henrissat B, Blanchette R, Grigoriev IV, Cullen D (2017). Draft genome sequence of a monokaryotic model brown-rot fungus Postia (Rhodonia) placenta SB12. Genom Data 14:21-…
Hage et al. (2021)	Hage H, Miyauchi S, Virágh M, Drula E, Min B, Chaduli D, Navarro D, Favel A, Norest M, Lesage-Meessen L, Bálint B, Merényi Z, de Eugenio L, Morin E, Martínez AT, Baldrian P, Štursová M, Martínez MJ, Novotny C, Magnuson JK, Spatafora JW, Maurice S, Pangilinan J, Andreopoulos W, LaButti K, Hundley H, Na H, Kuo A, Barry K, Lipzen A, Henrissat B, Riley R, Ahrendt S, Nagy LG, Grigoriev IV, Martin F, R…
Janbon et al. (2014)	Janbon G, Ormerod KL, Paulet D, Byrnes EJ 3rd, Yadav V, Chatterjee G, Mullapudi N, Hon CC, Billmyre RB, Brunel F, Bahn YS, Chen W, Chen Y, Chow EW, Coppée JY, Floyd-Averette A, Gaillardin C, Gerik KJ, Goldberg J, Gonzalez-Hilarion S, Gujja S, Hamlin JL, Hsueh YP, Ianiri G, Jones S, Kodira CD, Kozubowski L, Lam W, Marra M, Mesner LD, Mieczkowski PA, Moyrand F, Nielsen K, Proux C, Rossignol T, Sche…
Kämper et al. (2006)	Kämper J, Kahmann R, Bölker M, Ma LJ, Brefort T, Saville BJ, Banuett F, Kronstad JW, Gold SE, Müller O, Perlin MH, Wösten HA, de Vries R, Ruiz-Herrera J, Reynaga-Peña CG, Snetselaar K, McCann M, Pérez-Martín J, Feldbrügge M, Basse CW, Steinberg G, Ibeas JI, Holloman W, Guzman P, Farman M, Stajich JE, Sentandreu R, González-Prieto JM, Kennell JC, Molina L, Schirawski J, Mendoza-Mendoza A, Greiling…
Kohler et al. (2015)	Kohler A, Kuo A, Nagy LG, Morin E, Barry KW, Buscot F, Canbäck B, Choi C, Cichocki N, Clum A, Colpaert J, Copeland A, Costa MD, Doré J, Floudas D, Gay G, Girlanda M, Henrissat B, Herrmann S, Hess J, Högberg N, Johansson T, Khouja HR, LaButti K, Lahrmann U, Levasseur A, Lindquist EA, Lipzen A, Marmeisse R, Martino E, Murat C, Ngan CY, Nehls U, Plett JM, Pringle A, Ohm RA, Perotto S, Peter M, Riley…
Kuuskeri et al. (2016)	Kuuskeri J, Häkkinen M, Laine P, Smolander OP, Tamene F, Miettinen S, Nousiainen P, Kemell M, Auvinen P, Lundell T (2016). Time-scale dynamics of proteome and transcriptome of the white-rot fungus Phlebia radiata: growth on spruce wood and decay effect on lignocellulose. Biotechnol Biofuels 9(1):192. doi: 10.1186/s13068-016-0608-9
Levasseur et al. (2014)	Levasseur A, Lomascolo A, Chabrol O, Ruiz-Dueñas FJ, Boukhris-Uzan E, Piumi F, Kües U, Ram AF, Murat C, Haon M, Benoit I, Arfi Y, Chevret D, Drula E, Kwon MJ, Gouret P, Lesage-Meessen L, Lombard V, Mariette J, Noirot C, Park J, Patyshakuliyeva A, Sigoillot JC, Wiebenga A, Wösten HA, Martin F, Coutinho PM, de Vries RP, Martínez AT, Klopp C, Pontarotti P, Henrissat B, Record E (2014). The genome of…
Loftus et al. (2005)	Loftus BJ, Fung E, Roncaglia P, Rowley D, Amedeo P, Bruno D, Vamathevan J, Miranda M, Anderson IJ, Fraser JA, Allen JE, Bosdet IE, Brent MR, Chiu R, Doering TL, Donlin MJ, D'Souza CA, Fox DS, Grinberg V, Fu J, Fukushima M, Haas BJ, Huang JC, Janbon G, Jones SJ, Koo HL, Krzywinski MI, Kwon-Chung JK, Lengeler KB, Maiti R, Marra MA, Marra RE, Mathewson CA, Mitchell TG, Pertea M, Riggs FR, Salzberg S…
Looney et al. (2021)	Looney B, Miyauchi S, Morin E, Drula E, Courty PE, Kohler A, Kuo A, LaButti K, Pangilinan J, Lipzen A, Riley R, Andreopoulos W, He G, Johnson J, Nolan M, Tritt A, Barry KW, Grigoriev IV, Nagy LG, Hibbett D, Henrissat B, Matheny PB, Labbé J, Martin FM (2021). Evolutionary transition to the ectomycorrhizal habit in the genomes of a hyper-diverse lineage of mushroom-forming fungi. New Phytol. doi: 1…
Martin et al. (2008)	Martin F, Aerts A, Ahrén D, Brun A, Danchin EG, Duchaussoy F, Gibon J, Kohler A, Lindquist E, Pereda V, Salamov A, Shapiro HJ, Wuyts J, Blaudez D, Buée M, Brokstein P, Canbäck B, Cohen D, Courty PE, Coutinho PM, Delaruelle C, Detter JC, Deveau A, DiFazio S, Duplessis S, Fraissinet-Tachet L, Lucic E, Frey-Klett P, Fourrey C, Feussner I, Gay G, Grimwood J, Hoegger PJ, Jain P, Kilaru S, Labbé J, Lin…
Miettinen et al. (2016)	Miettinen O, Riley R, Barry K, Cullen D, de Vries RP, Hainaut M, Hatakka A, Henrissat B, Hildén K, Kuo R, LaButti K, Lipzen A, Mäkelä MR, Sandor L, Spatafora JW, Grigoriev IV, Hibbett DS (2016). Draft Genome Sequence of the White-Rot Fungus Obba rivulosa 3A-2. Genome Announc 4(5):. doi: 10.1128/genomeA.00976-16
Min et al. (2015)	Min B, Park H, Jang Y, Kim JJ, Kim KH, Pangilinan J, Lipzen A, Riley R, Grigoriev IV, Spatafora JW, Choi IG (2015). Genome sequence of a white rot fungus Schizopora paradoxa KUC8140 for wood decay and mycoremediation. J Biotechnol 211():42-3. doi: 10.1016/j.jbiotec.2015.06.426
Miyauchi et al. (2020)	Miyauchi S, Kiss E, Kuo A, Drula E, Kohler A, Sánchez-García M, Morin E, Andreopoulos B, Barry KW, Bonito G, Buée M, Carver A, Chen C, Cichocki N, Clum A, Culley D, Crous PW, Fauchery L, Girlanda M, Hayes RD, Kéri Z, LaButti K, Lipzen A, Lombard V, Magnuson J, Maillard F, Murat C, Nolan M, Ohm RA, Pangilinan J, Pereira MF, Perotto S, Peter M, Pfister S, Riley R, Sitrit Y, Stielow JB, Szöllősi G, …
Miyauchi et al. (2018)	Miyauchi S, Rancon A, Drula E, Hage H, Chaduli D, Favel A, Grisel S, Henrissat B, Herpoël-Gimbert I, Ruiz-Dueñas FJ, Chevret D, Hainaut M, Lin J, Wang M, Pangilinan J, Lipzen A, Lesage-Meessen L, Navarro D, Riley R, Grigoriev IV, Zhou S, Raouche S, Rosso MN (2018). Integrative visual omics of the white-rot fungus Polyporus brumalis exposes the biotechnological potential of its oxidative enzymes f…
Morin et al. (2012)	Morin E, Kohler A, Baker AR, Foulongne-Oriol M, Lombard V, Nagy LG, Ohm RA, Patyshakuliyeva A, Brun A, Aerts AL, Bailey AM, Billette C, Coutinho PM, Deakin G, Doddapaneni H, Floudas D, Grimwood J, Hildén K, Kües U, Labutti KM, Lapidus A, Lindquist EA, Lucas SM, Murat C, Riley RW, Salamov AA, Schmutz J, Subramanian V, Wösten HA, Xu J, Eastwood DC, Foster GD, Sonnenberg AS, Cullen D, de Vries RP, L…
Muraguchi et al. (2015)	Muraguchi H, Umezawa K, Niikura M, Yoshida M, Kozaki T, Ishii K, Sakai K, Shimizu M, Nakahori K, Sakamoto Y, Choi C, Ngan CY, Lindquist E, Lipzen A, Tritt A, Haridas S, Barry K, Grigoriev IV, Pukkila PJ (2015). Strand-Specific RNA-Seq Analyses of Fruiting Body Development in Coprinopsis cinerea. PLoS One 10(10):e0141586. doi: 10.1371/journal.pone.0141586
Nagy et al. (2016)	Nagy LG, Riley R, Tritt A, Adam C, Daum C, Floudas D, Sun H, Yadav JS, Pangilinan J, Larsson KH, Matsuura K, Barry K, Labutti K, Kuo R, Ohm RA, Bhattacharya SS, Shirouzu T, Yoshinaga Y, Martin FM, Grigoriev IV, Hibbett DS (2016). Comparative Genomics of Early-Diverging Mushroom-Forming Fungi Provides Insights into the Origins of Lignocellulose Decay Capabilities. Mol Biol Evol 33(4):959-70. doi: …
Ohm et al. (2010)	Ohm RA, de Jong JF, Lugones LG, Aerts A, Kothe E, Stajich JE, de Vries RP, Record E, Levasseur A, Baker SE, Bartholomew KA, Coutinho PM, Erdmann S, Fowler TJ, Gathman AC, Lombard V, Henrissat B, Knabe N, Kües U, Lilly WW, Lindquist E, Lucas S, Magnuson JK, Piumi F, Raudaskoski M, Salamov A, Schmutz J, Schwarze FW, vanKuyk PA, Horton JS, Grigoriev IV, Wösten HA (2010). Genome sequence of the model…
Ohm et al. (2014)	Ohm RA, Riley R, Salamov A, Min B, Choi IG, Grigoriev IV (2014). Genomics of wood-degrading fungi. Fungal Genet Biol 72:82-90. doi: 10.1016/j.fgb.2014.05.001
Olson et al. (2012)	Olson A, Aerts A, Asiegbu F, Belbahri L, Bouzid O, Broberg A, Canbäck B, Coutinho PM, Cullen D, Dalman K, Deflorio G, van Diepen LT, Dunand C, Duplessis S, Durling M, Gonthier P, Grimwood J, Fossdal CG, Hansson D, Henrissat B, Hietala A, Himmelstrand K, Hoffmeister D, Högberg N, James TY, Karlsson M, Kohler A, Kües U, Lee YH, Lin YC, Lind M, Lindquist E, Lombard V, Lucas S, Lundén K, Morin E, Mur…
Padamsee et al. (2012)	Padamsee M, Kumar TK, Riley R, Binder M, Boyd A, Calvo AM, Furukawa K, Hesse C, Hohmann S, James TY, LaButti K, Lapidus A, Lindquist E, Lucas S, Miller K, Shantappa S, Grigoriev IV, Hibbett DS, McLaughlin DJ, Spatafora JW, Aime MC (2012). The genome of the xerotolerant mold Wallemia sebi reveals adaptations to osmotic stress and suggests cryptic sexual reproduction. Fungal Genet Biol 49(3):217-26…
Pendleton et al. (2014)	Pendleton AL, Smith KE, Feau N, Martin FM, Grigoriev IV, Hamelin R, Nelson CD, Burleigh JG, Davis JM (2014). Duplications and losses in gene families of rust pathogens highlight putative effectors. Front Plant Sci 5:299. doi: 10.3389/fpls.2014.00299
Persoons et al. (2021)	Persoons A, Maupetit A, Louet C, Andrieux A, Lipzen A, Barry KW, Na H, Adam C, Grigoriev IV, Segura V, Duplessis S, Frey P, Halkett F, De Mita S (2021). Genomic signatures of a major adaptive event in the pathogenic fungus Melampsora larici-populina. Genome Biol Evol. doi: 10.1093/gbe/evab279
Riley et al. (2014)	Riley R, Salamov AA, Brown DW, Nagy LG, Floudas D, Held BW, Levasseur A, Lombard V, Morin E, Otillar R, Lindquist EA, Sun H, LaButti KM, Schmutz J, Jabbour D, Luo H, Baker SE, Pisabarro AG, Walton JD, Blanchette RA, Henrissat B, Martin F, Cullen D, Hibbett DS, Grigoriev IV (2014). Extensive sampling of basidiomycete genomes demonstrates inadequacy of the white-rot/brown-rot paradigm for wood deca…
Stajich et al. (2010)	Stajich JE, Wilke SK, Ahrén D, Au CH, Birren BW, Borodovsky M, Burns C, Canbäck B, Casselton LA, Cheng CK, Deng J, Dietrich FS, Fargo DC, Farman ML, Gathman AC, Goldberg J, Guigó R, Hoegger PJ, Hooker JB, Huggins A, James TY, Kamada T, Kilaru S, Kodira C, Kües U, Kupfer D, Kwan HS, Lomsadze A, Li W, Lilly WW, Ma LJ, Mackey AJ, Manning G, Martin F, Muraguchi H, Natvig DO, Palmerini H, Ramesh MA, R…
Tang et al. (2012)	Tang JD, Perkins AD, Sonstegard TS, Schroeder SG, Burgess SC, Diehl SV (2012). Short-read sequencing for genomic analysis of the brown rot fungus Fibroporia radiculosa. Appl Environ Microbiol 78(7):2272-81. doi: 10.1128/AEM.06745-11
Varga et al. (2019)	Varga T, Krizsán K, Földi C, Dima B, Sánchez-García M, Sánchez-Ramírez S, Szöllősi GJ, Szarkándi JG, Papp V, Albert L, Andreopoulos W, Angelini C, Antonín V, Barry KW, Bougher NL, Buchanan P, Buyck B, Bense V, Catcheside P, Chovatia M, Cooper J, Dämon W, Desjardin D, Finy P, Geml J, Haridas S, Hughes K, Justo A, Karasiński D, Kautmanova I, Kiss B, Kocsubé S, Kotiranta H, LaButti KM, Lechner BE, L…
Xu et al. (2007)	Xu J, Saunders CW, Hu P, Grant RA, Boekhout T, Kuramae EE, Kronstad JW, Deangelis YM, Reeder NL, Johnstone KR, Leland M, Fieno AM, Begley WM, Sun Y, Lacey MP, Chaudhary T, Keough T, Chu L, Sears R, Yuan B, Dawson TL Jr (2007). Dandruff-associated Malassezia genomes reveal convergent and divergent virulence traits shared with plant and human fungal pathogens. Proc Natl Acad Sci U S A 104(47):18730…
Zajc et al. (2013)	Zajc J, Liu Y, Dai W, Yang Z, Hu J, Gostinčar C, Gunde-Cimerman N (2013). Genome and transcriptome sequencing of the halophilic fungus Wallemia ichthyophaga: haloadaptations present and absent. BMC Genomics 14:617. doi: 10.1186/1471-2164-14-617
